# Supplementary material for: The association between body mass index and brain morphology in children: a population-based study
Source: Springer Nature journal article supplement (doi:10.1007/s00429-020-02209-0), 2021-01-23
Supplement: MOESM2 [file 18793922]

Supplementary figure 1: Distribution of BMI-SDS

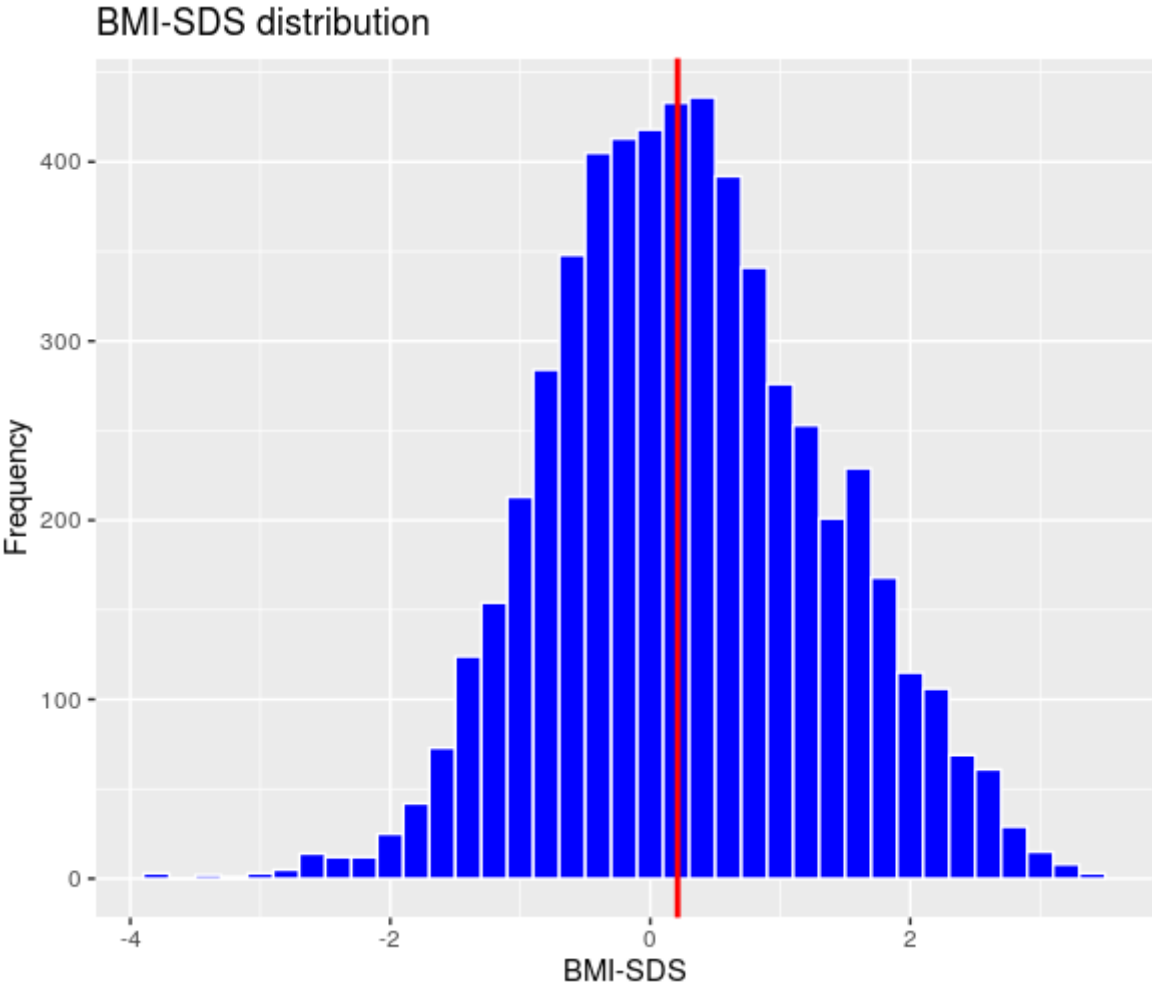

Note: the vertical red line shows the BMI-SDS median (BMI-SDS=0.21)
